# Supplementary figures and images for: Valorisation of citrus waste for sustainable synthesis of carbon-supported copper nanoparticles active in CO2 electroreduction
Source: Royal Society of Chemistry journal article supplement (doi:10.1039/d4su00463a), 2024-12-27

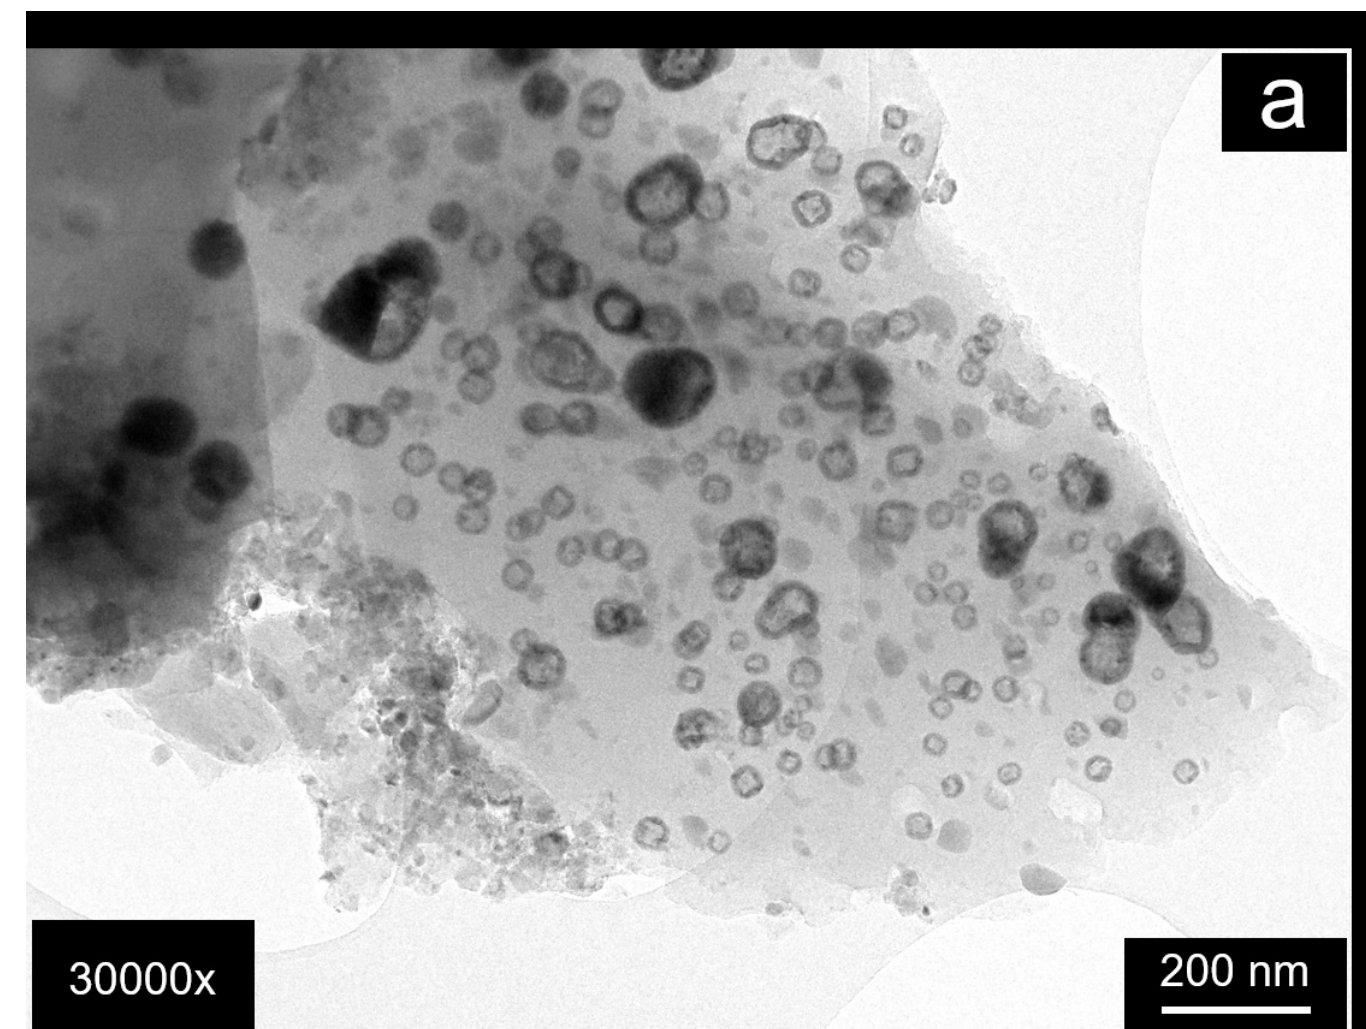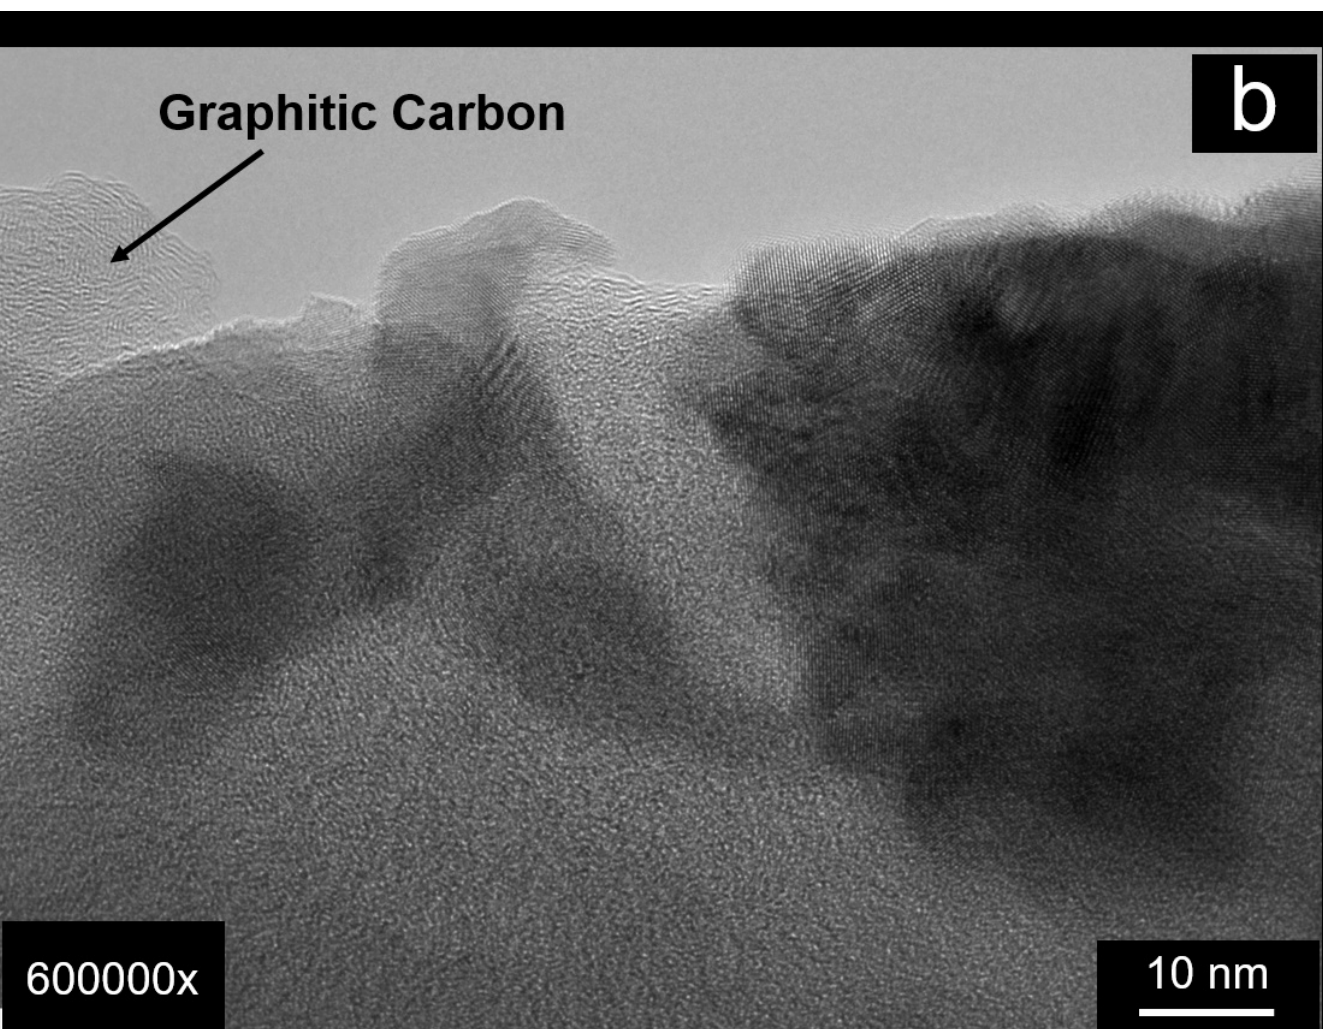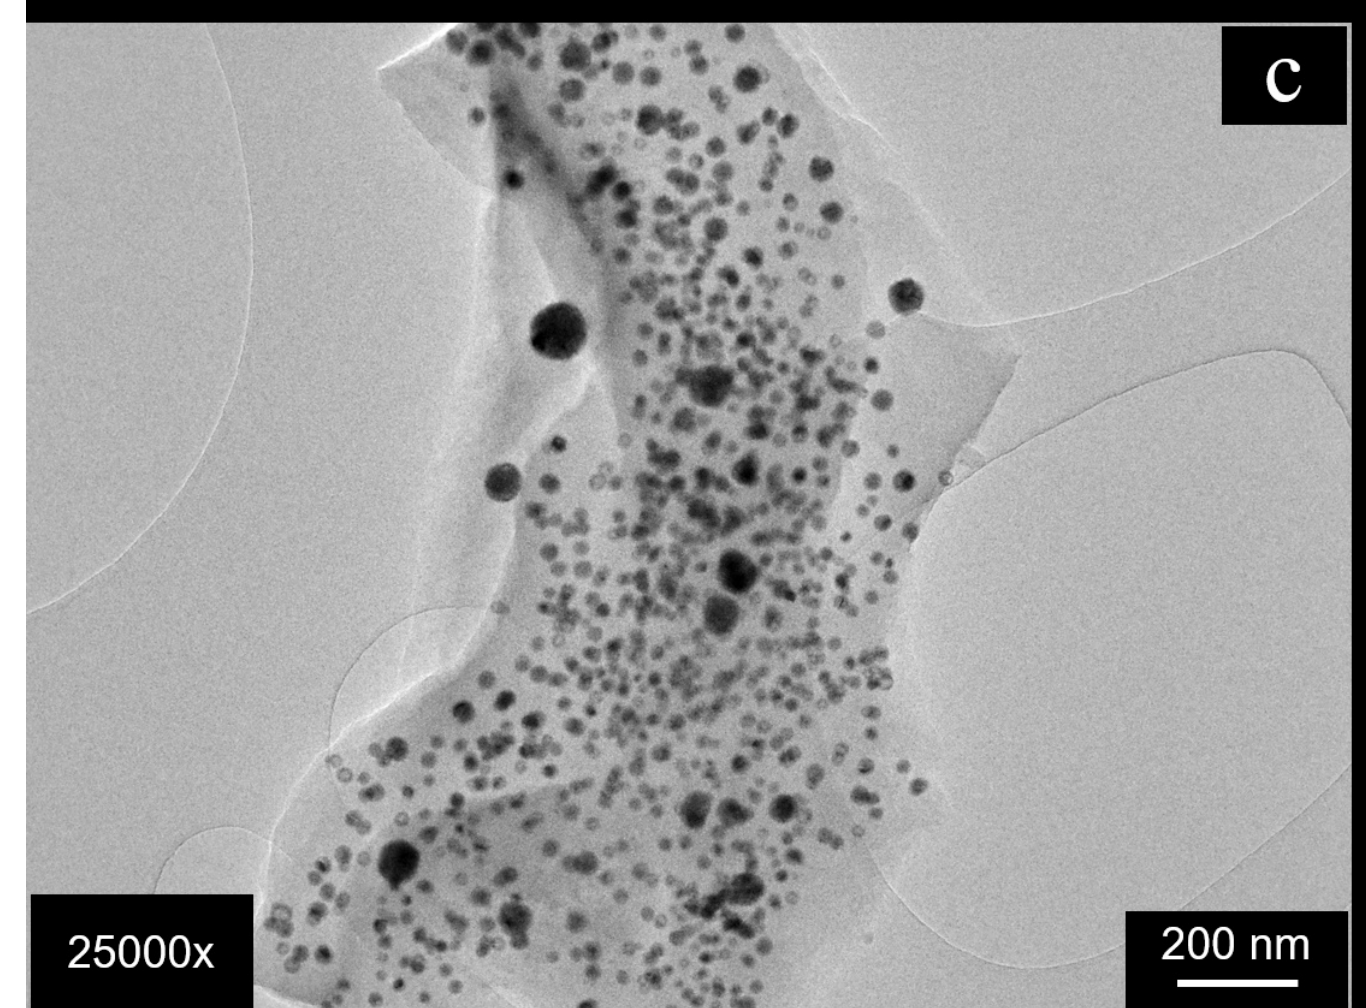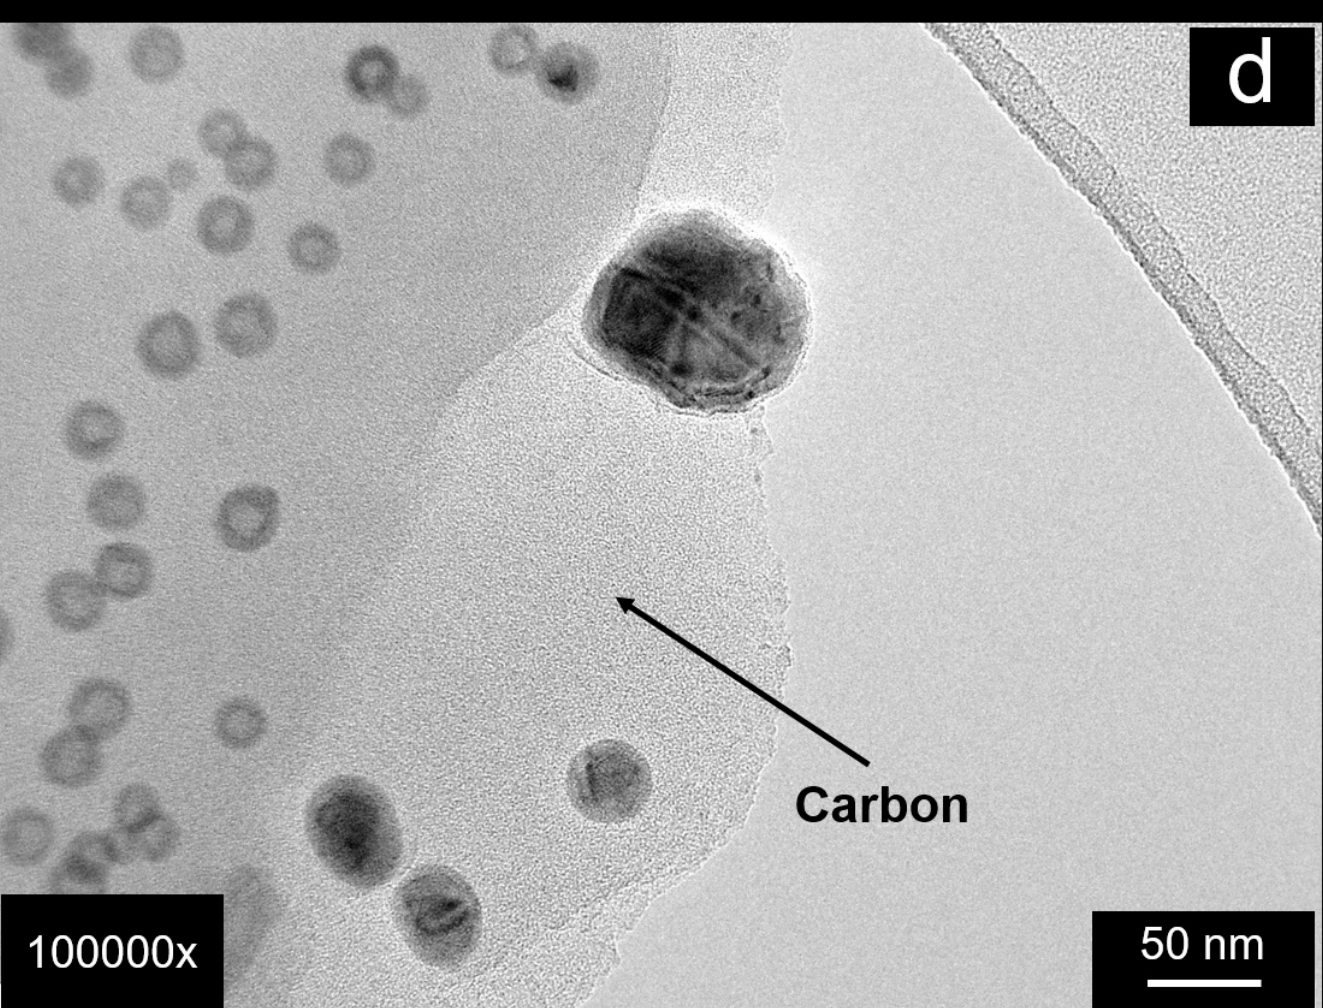

Supplement: d4su00463a1.pdf [file d4su00463a1.pdf]

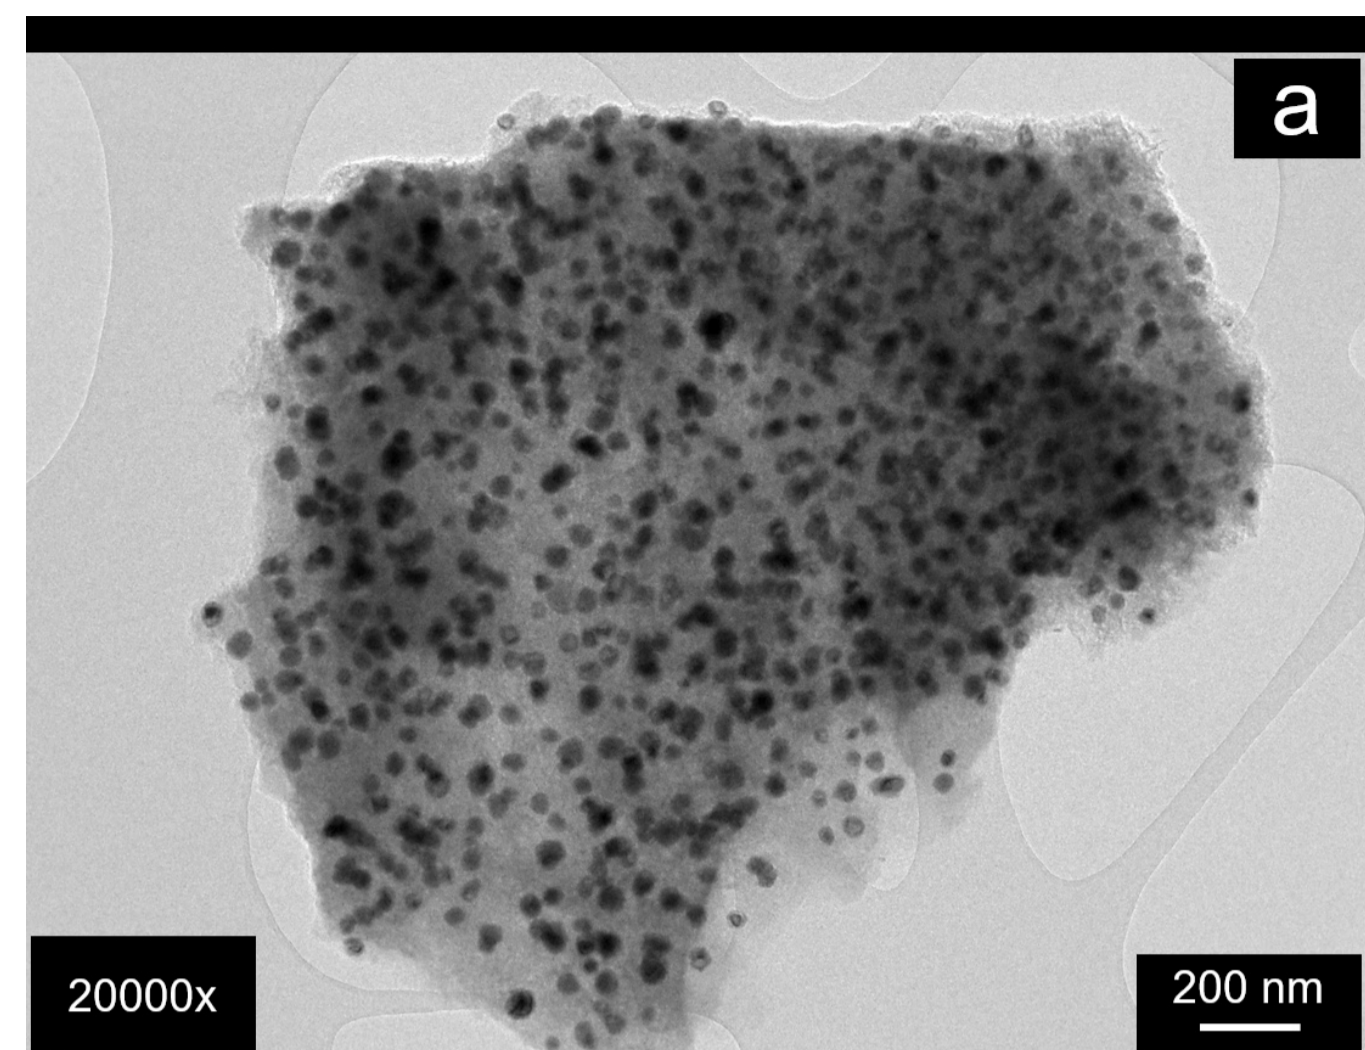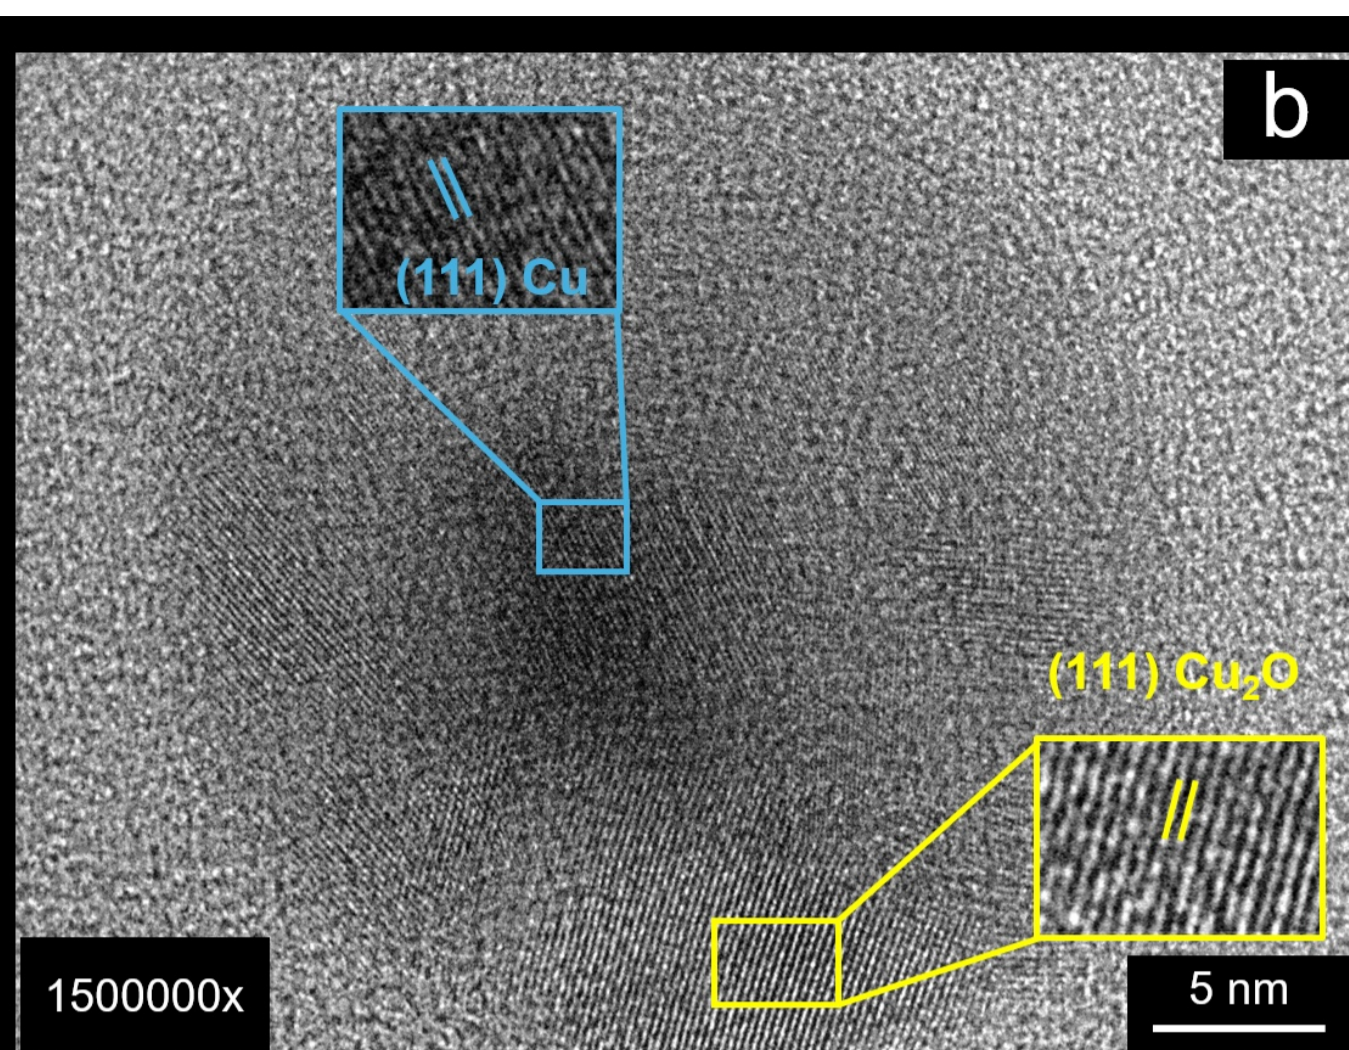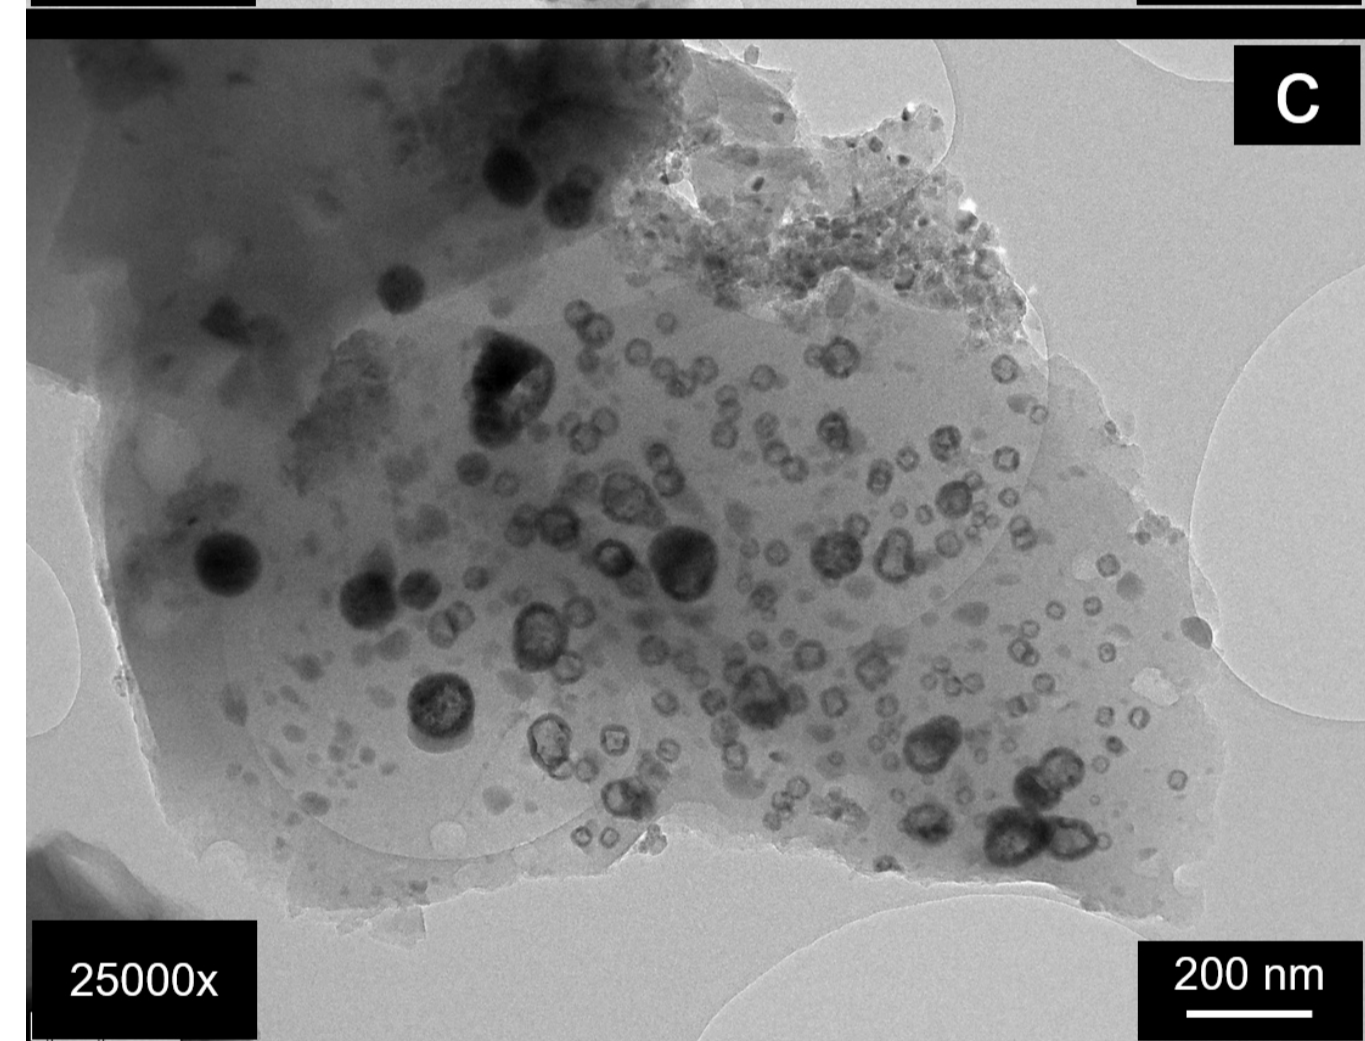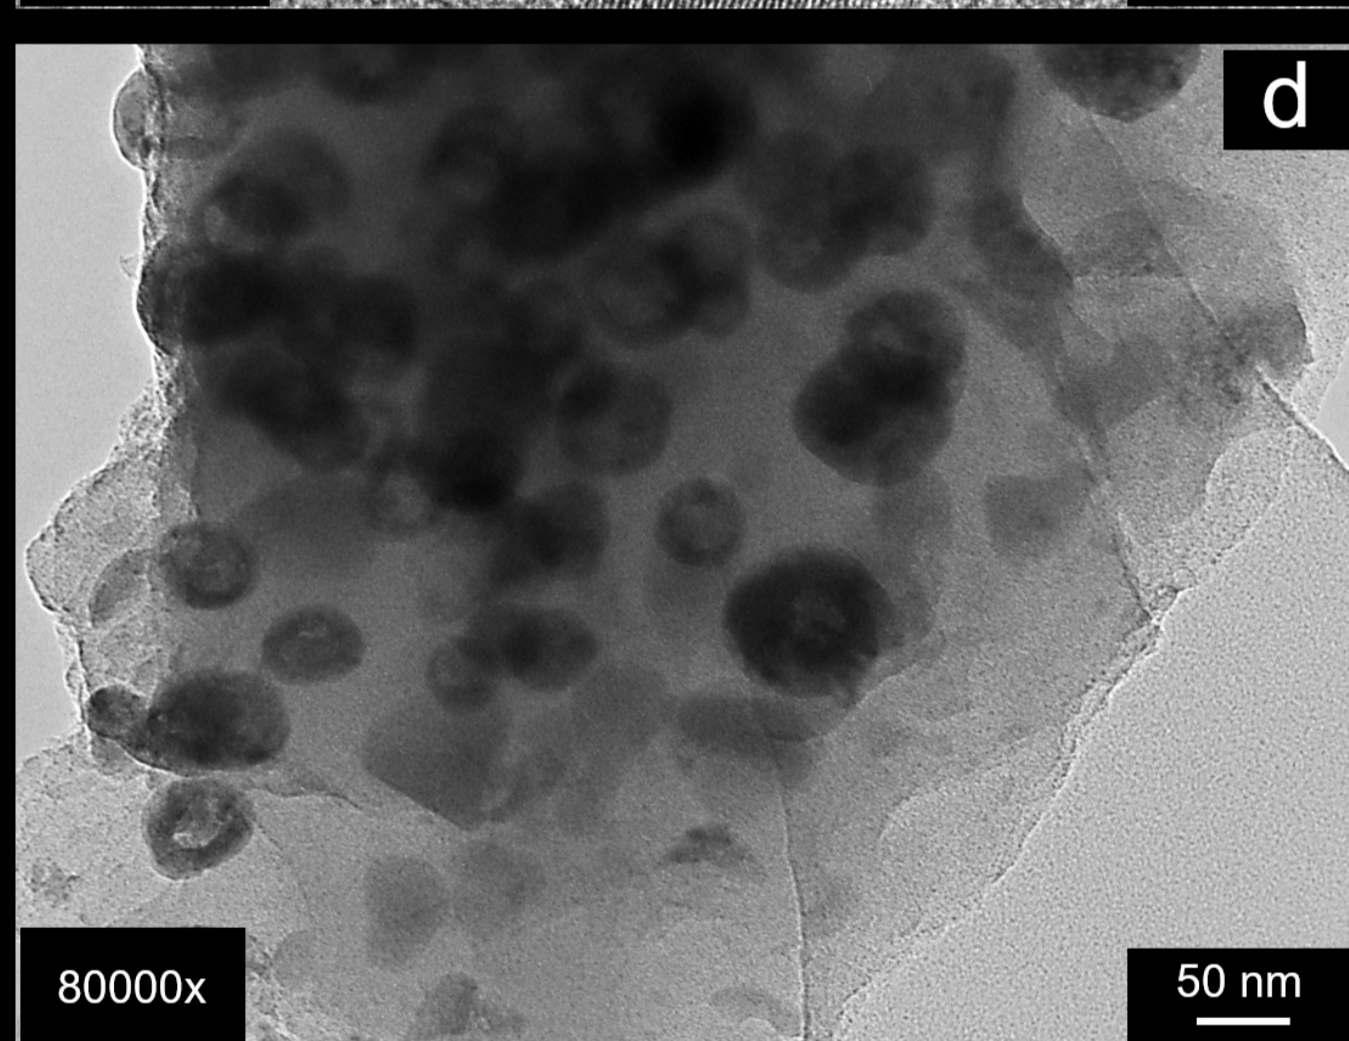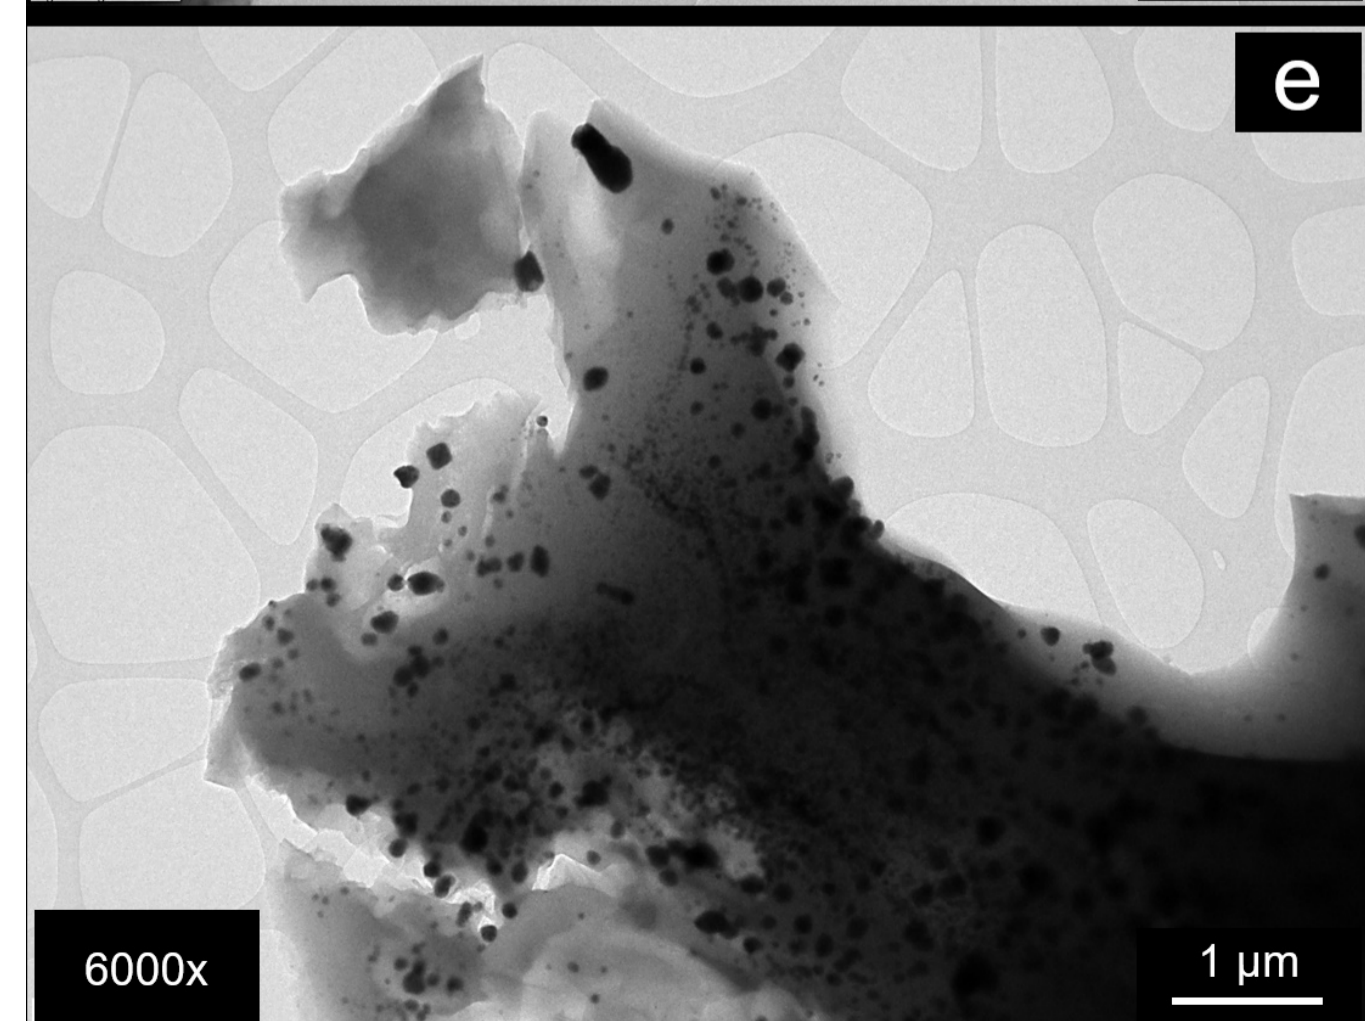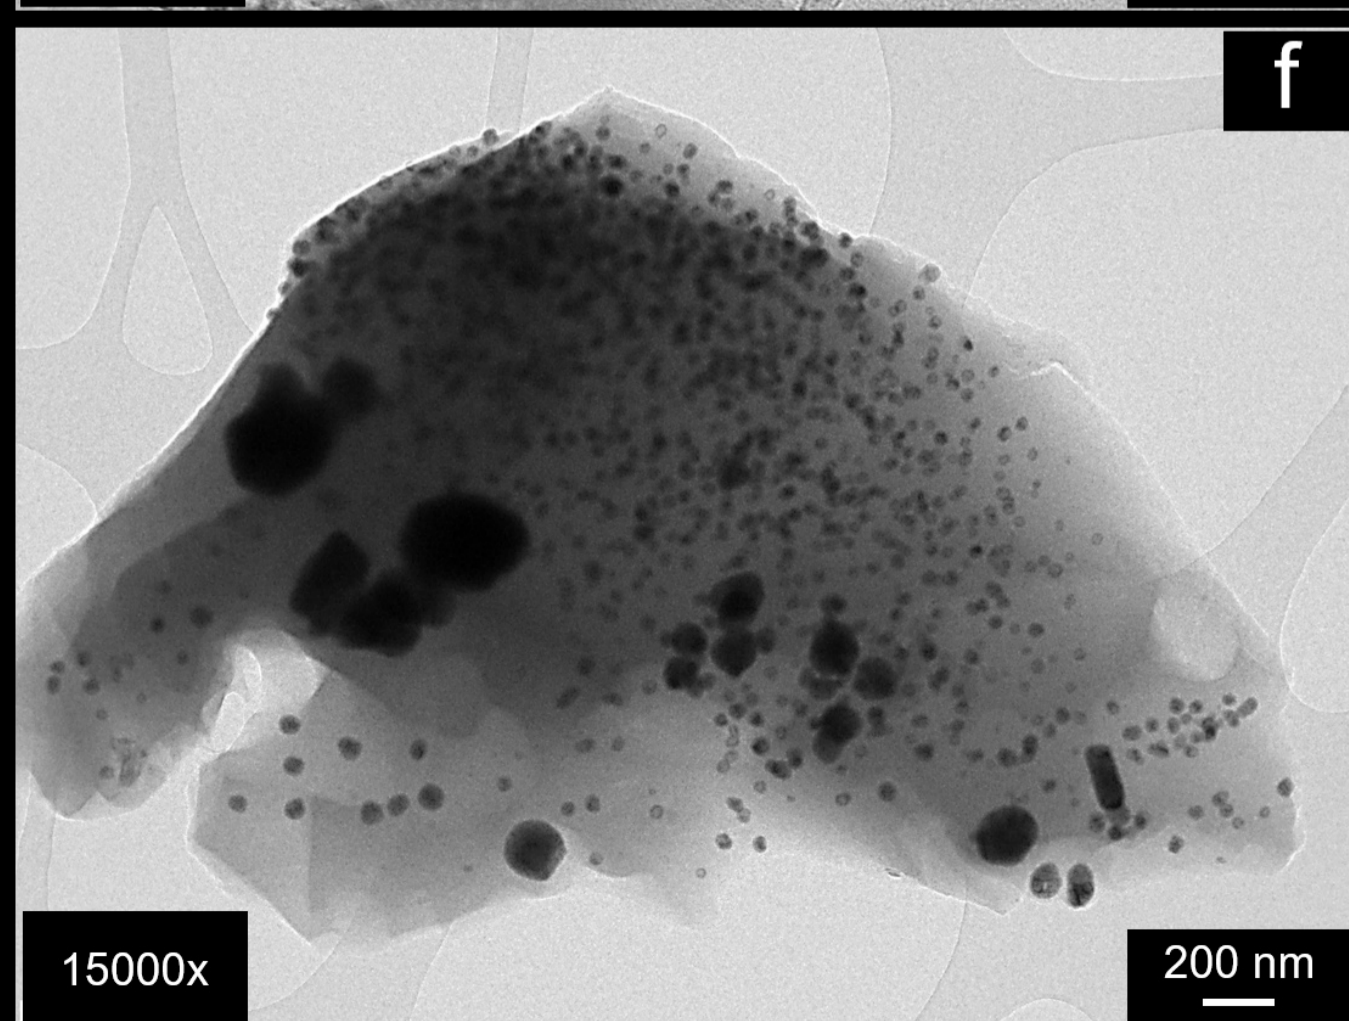

Supplement: d4su00463a2.pdf [file d4su00463a2.pdf]

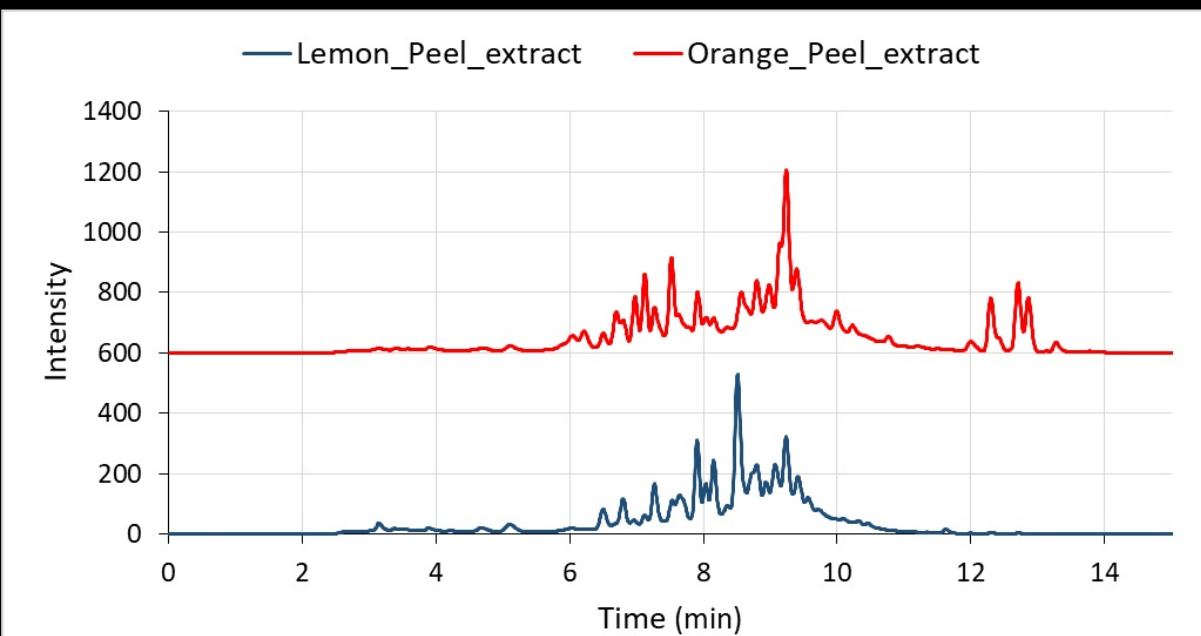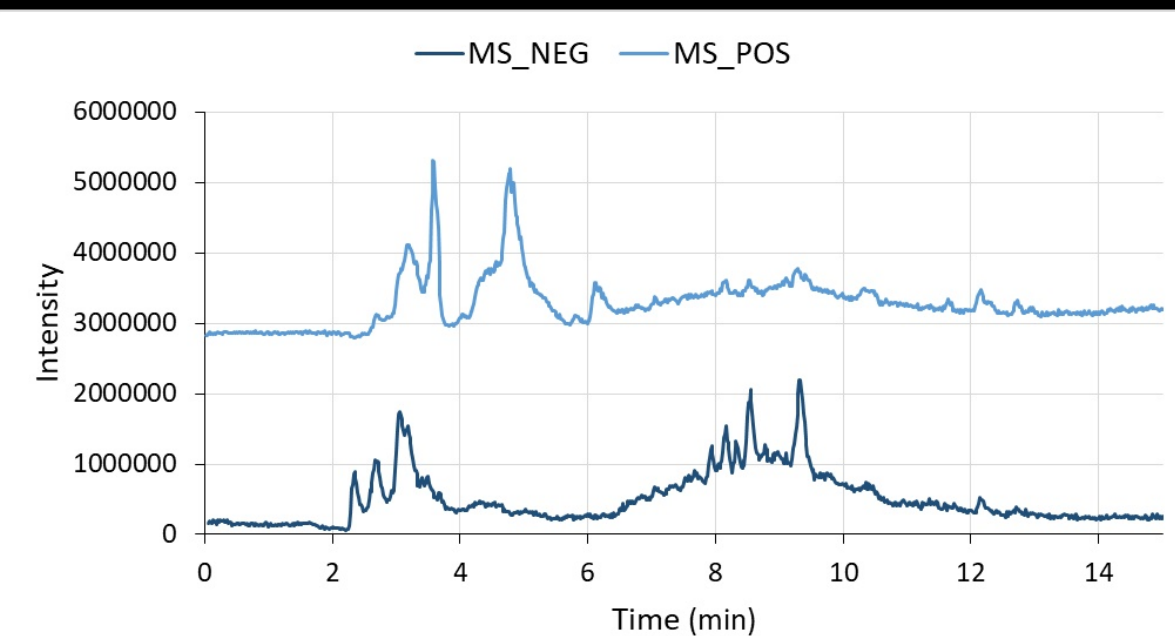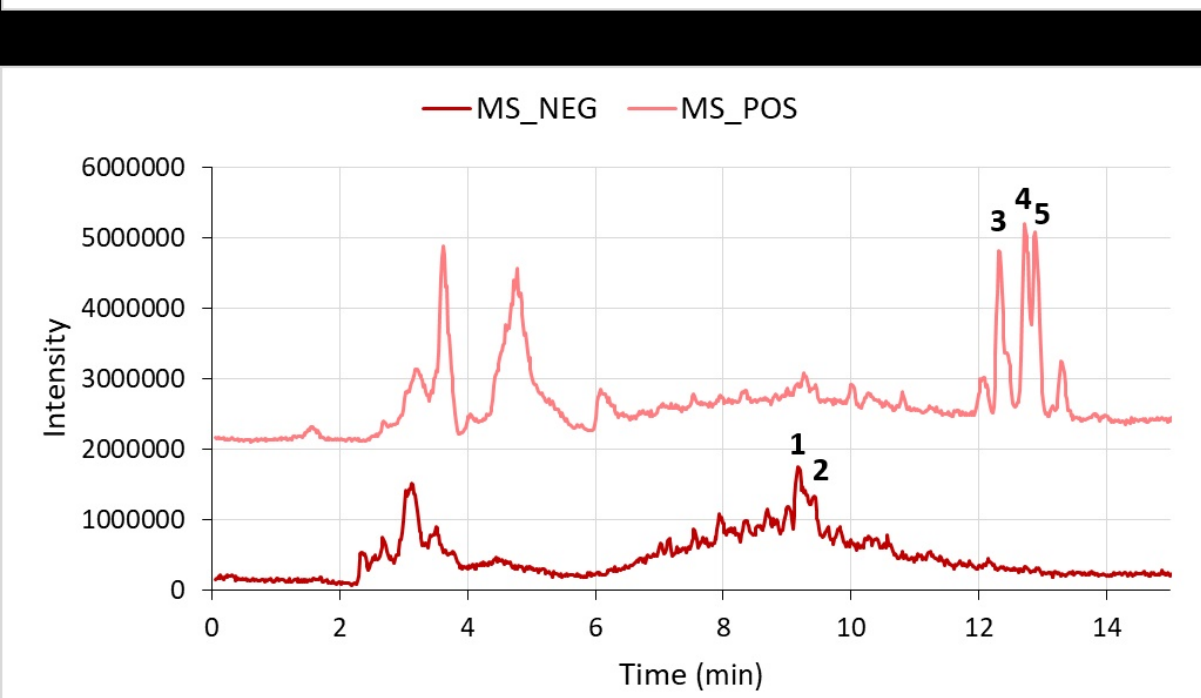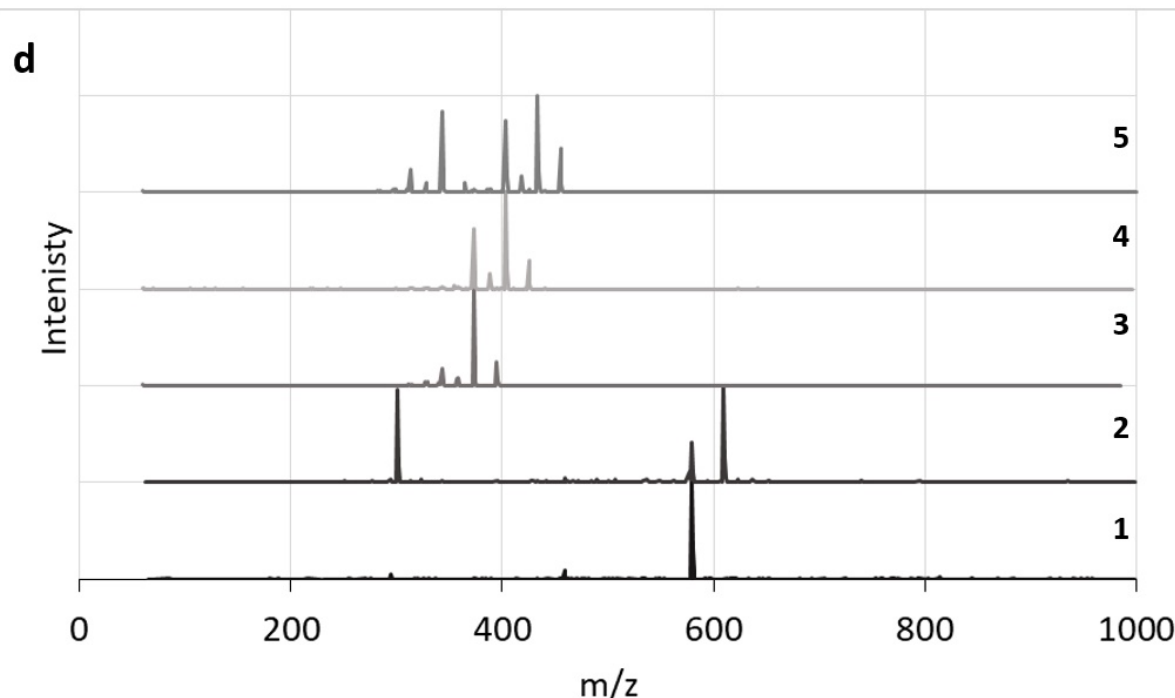

Supplement: d4su00463a3.pdf [file d4su00463a3.pdf]
